# Supplementary material
Source: Springer Nature journal article supplement (https://www.springermedizin.de/resource/supplementary/12936_2014_3569_MOESM11_ESM.pdf/9545928)

#

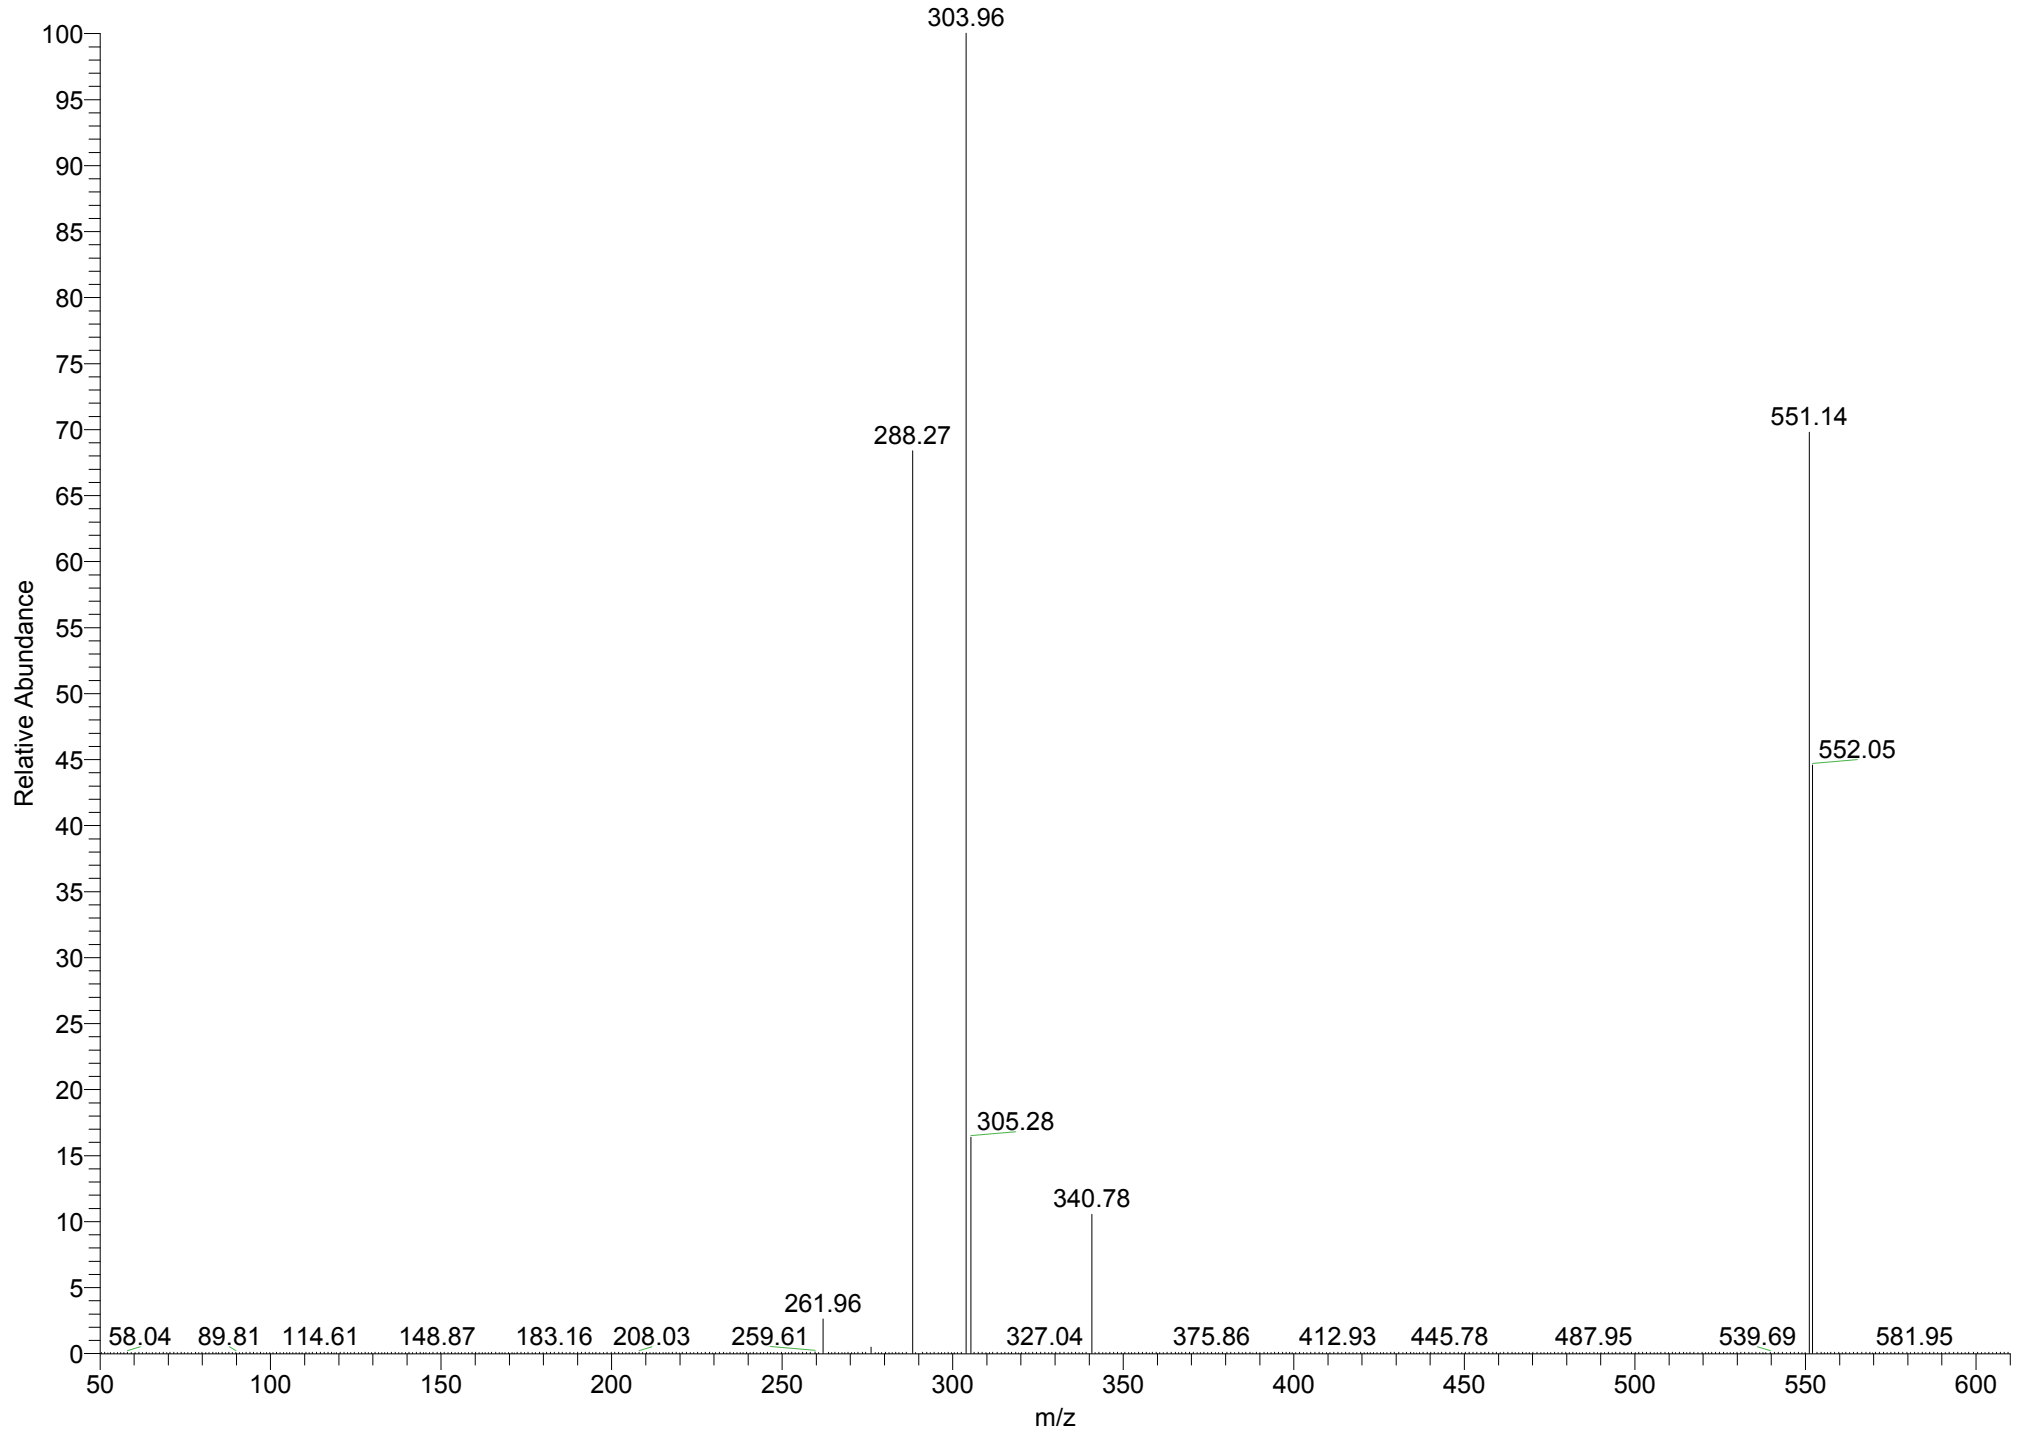

Supplement: MOESM11 [file 9545928]
